## Mitosis-specific phosphorylation of Mis18 $\alpha$ by Aurora B kinase enhances kinetochore recruitment of polo-like kinase 1

Minkyung Lee<sup>1,\*</sup>, Ik Soo Kim<sup>1,\*</sup>, Koog Chan Park<sup>2</sup>, Jong-Seo Kim<sup>3</sup>, Sung Hee Baek<sup>1</sup>, and Keun Il Kim<sup>2</sup>

<sup>1</sup>Creative Research Initiatives Center for Chromatin Dynamics, Department of Biological Sciences, Seoul National University, Seoul 08826, South Korea

<sup>2</sup>Department of Biological Sciences, Cellular Heterogeneity Research Center, Sookmyung Women's University, Seoul 04310, South Korea

<sup>3</sup>Center for RNA Research, Institute for Basic Science, Department of Biological Sciences, Seoul National University, Seoul 08826, South Korea

\*These authors contributed equally to this work

**Correspondence to:** Keun Il Kim, **email:** kikim@sookmyung.ac.kr  
Sung Hee Baek, **email:** sbaek@snu.ac.kr

**Keywords:** *Mis18 $\alpha$* ; *Aurora B kinase*; *PLK1*; *mitosis-specific phosphorylation*; *polo box domain*

**Received:** August 06, 2017

**Accepted:** October 28, 2017

**Published:** November 27, 2017

**Copyright:** Lee et al. This is an open-access article distributed under the terms of the Creative Commons Attribution License 3.0 (CC BY 3.0), which permits unrestricted use, distribution, and reproduction in any medium, provided the original author and source are credited.

### ABSTRACT

**Mis18 $\alpha$ , a component of Mis18 complex comprising of Mis18 $\alpha$ , Mis18 $\beta$ , and M18BP1, is known to localize at the centromere from late telophase to early G1 phase and plays a priming role in CENP-A deposition. Although its role in CENP-A deposition is well established, the other function of Mis18 $\alpha$  remains unknown. Here, we elucidate a new function of Mis18 $\alpha$  that is critical for the proper progression of cell cycle independent of its role in CENP-A deposition. We find that Aurora B kinase phosphorylates Mis18 $\alpha$  during mitosis not affecting neither centromere localization of Mis18 complex nor centromere loading of CENP-A. However, the replacement of endogenous Mis18 $\alpha$  by phosphorylation-defective mutant causes mitotic defects including micronuclei formation, chromosome misalignment, and chromosomal bridges. Together, our data demonstrate that Aurora B kinase-mediated mitotic phosphorylation of Mis18 $\alpha$  is a crucial event for faithful cell cycle progression through the enhanced recruitment of polo-like kinase 1 to the kinetochore.**

### INTRODUCTION

Accurate segregation of duplicated chromosomes is crucial for daughter cells to have one copy of each chromosome during cell division. To complete accurate segregation, the chromosome should be condensed properly and mitotic spindle should bind to kinetochore bi-oriented [1]. The kinetochore is formed on a chromosomal locus called centromere that is composed of DNA segments and histone proteins containing centromere-specific H3 variant, CENP-A [2]. Mis18 complex (Mis18 $\alpha$ , Mis18 $\beta$  and M18BP1) in higher eukaryote is a critical factor for the recruitment of newly synthesized CENP-A to the centromere at early G1 phase [3, 4].

Previously, it has been reported that deletion of *Mis18 $\alpha$*  in mice causes embryonic lethality as well as

defect in epidermal stratification, which are accompanied with CENP-A loss at the centromere and defects in chromosome segregation [3, 5]. Mis18 complex localizes to the centromere from telophase to early G1 phase of cell cycle prior to the CENP-A deposition to centromere [4, 6]. Phosphorylation of M18BP1 is involved in the regulation of the timing of centromere localization and licensing function of Mis18 complex. CDK1/2-mediated phosphorylation of M18BP1 on multiple sites blocks its interaction with Mis18 $\alpha$ /Mis18 $\beta$  and hence centromere localization during S/G2/M phases, whereas phosphorylation of M18BP1 by PLK1 at early G1 phase facilitates centromere localization of Mis18 complex and its licensing function [7, 8].

Among mitotic kinases, Aurora serine/threonine kinases work crucially during mitosis. Aurora A

kinase locates pericentrosome and regulates mitotic spindle assembly, centrosome separation and G2/M transition at the beginning of mitosis [9, 10]. Aurora B kinase locates innercentromere from prometaphase to metaphase regulating chromatin modification and chromatid separation, and relocates to midzone for cytokinesis [11]. Phosphorylation of Aurora B targets in the innercentromere participates in spindle checkpoint and regulates the microtubule-kinetochore interaction [12, 13]. Dephosphorylation of the Aurora B targets gives strong tension between microtubule and kinetochore allowing the cells to go to anaphase [1].

Recently, Aurora B kinase-PLK1-MCAK (mitotic centromere-associated kinesin) axis has been shown to be required for accurate chromosome segregation [14]. At the kinetochore, Aurora B kinase activates PLK1 by phosphorylation and the activated PLK1 in turn phosphorylates MCAK, which is essential for accurate chromosome segregation with its increased microtubule depolymerase activity. Inhibition of either Aurora B kinase or PLK1 reduces MCAK phosphorylation on PLK1 target sites and induces formation of impolar mitotic spindle and the chromatin bridges. Interestingly, PLK1 is also needed for the full activation of Aurora B kinase at the beginning of prometaphase. Aurora B kinase, Survivin, INCENP, and borealin are members of chromosomal passenger complex (CPC) and Survivin phosphorylation by PLK1 elicits Aurora B kinase activity around kinetochore [15]. Thus, the cooperation between Aurora B kinase and PLK1 is a very important biological process for accurate chromosome segregation.

In this study, we report that Aurora B kinase phosphorylates Mis18 $\alpha$  during mitosis, specifically at prometaphase which is critical for the faithful chromosome segregation. During prometaphase, microtubule dynamically interacts with kinetochore for the proper attachment and the process is regulated by Aurora B kinase and PLK1. Notably, we found Mis18 $\alpha$  phosphorylation by Aurora B kinase is important for the recruitment of PLK1 to the kinetochore and for preventing the mitotic defects.

## RESULTS

### Mis18 $\alpha$ is phosphorylated during mitosis by Aurora B kinase

Although Mis18 $\alpha$  has been shown to function as a licensing factor for the recruitment of newly synthesized CENP-A to centromere at G1 phase, whether Mis18 $\alpha$  is involved in the processes of cell division cycle has not been investigated. As Mis18 $\alpha$  protein level is not changed through the cell cycle, we anticipated that post-translational modification of Mis18 $\alpha$  might act as a signal for the regulating Mis18 $\alpha$  function. Therefore, we analyzed whether Mis18 $\alpha$  is phosphorylated during cell cycle

progression by the mitotic kinases that actively regulate mitosis. HeLa cells stably expressing Flag-Mis18 $\alpha$  were mitotically synchronized by nocodazole treatment and the phosphorylation level of Mis18 $\alpha$  was analyzed. Interestingly, we detected increased phosphorylation level of Mis18 $\alpha$  from the mitotic cell extracts comparable to the H3S10 phosphorylation, a mitotic marker (Figure 1A). Consistently, Mis18 $\alpha$  phosphorylation increased at mitotic phase after release from G1/S cell cycle synchronization by double thymidine block (Figure 1B), confirming mitosis-specific phosphorylation of Mis18 $\alpha$ . We next screened for potential kinases that are responsible for Mis18 $\alpha$  phosphorylation during mitosis. Among several mitotic kinases tested, only Aurora B kinase was able to phosphorylate Mis18 $\alpha$  (Figure 1C). We also found the increased binding between Mis18 $\alpha$  and Aurora B kinase during mitosis (Figure 1D and 1E), which matches well with the phosphorylation pattern of Mis18 $\alpha$ . Furthermore, the kinase dead (KD) mutant of Aurora B kinase failed to phosphorylate Mis18 $\alpha$  (Figure 1F), indicating that Aurora B kinase activity is crucial for Mis18 $\alpha$  phosphorylation.

Next, we searched for the phosphorylation site by Aurora B kinase in Mis18 $\alpha$ , which is recognized by the consensus sequence, [R/K]-X-[S/T], and found that Mis18 $\alpha$  contains only one serine residue that matches with the consensus sequence in both mouse (Ser13) and human (Ser36) (Figure 1G). LC-MS/MS analysis of Mis18 $\alpha$  from mitotically synchronized 293T cells confirmed Ser36 as the phosphorylation site during mitosis (Supplementary Figure 1). Thus, we generated phosphorylation-specific antibody against the peptide of Mis18 $\alpha$  and the resulting antibody detected phosphorylated form of peptide much stronger than non-phospho peptide control (Figure 1H). We then evaluated the specificity of our phospho-specific Mis18 $\alpha$  antibody. The antibody detected a specific band corresponding to Mis18 $\alpha$  only in nocodazole-treated cell extracts and  $\lambda$ -phosphatase (a Ser/Thr/Tyr phosphatase) treatment abolished the signal (Figure 1I). In addition, the antibody efficiently detected the increased phosphorylation of Mis18 $\alpha$  WT in nocodazole-arrested cells. However, the expression of Mis18 $\alpha$  SA, a mutant Mis18 $\alpha$  containing alanine substitution of Ser36, did not give rise to any significant signal (Figure 1J). In an attempt to clarify the time of Mis18 $\alpha$  Ser36 phosphorylation with this new phospho-specific antibody, the antibody generated the strongest signal during mitosis in consistency with H3S10 phosphorylation (Supplementary Figure 2A). Furthermore, synchronization of cells by mitotic drugs other than nocodazole, such as monastrol and taxol, increased phosphorylation of Mis18 $\alpha$  (Supplementary Figure 2B). In an *in vitro* kinase assay with bacterially expressed Mis18 $\alpha$ , purified active Aurora B phosphorylated wild-type Mis18 $\alpha$  but not Mis18 $\alpha$  SA (Figure 1K). Mis18 $\alpha$  phosphorylation increased in mitotic cells, but decreased as the cells exited mitosis (Figure 1L). MG132, which induces metaphase arrest by inhibiting

APC-mediated proteolysis [17], maintained Mis18 $\alpha$  phosphorylation in parallel with H3S10 phosphorylation, although the cells were released from nocodazole-mediated arrest (Figure 1M). Concurrently, the binding between Aurora B kinase and Mis18 $\alpha$  increased during mitosis and decreased as the cells exited mitosis, but not under APC block, in parallel with Mis18 $\alpha$  phosphorylation pattern (Figure 1N). Moreover, the treatment of cells with Aurora B kinase inhibitor, Hesperadin [16] diminished the phosphorylation of Mis18 $\alpha$  induced by mitotic arrest (Figure 1O), indicating that Aurora B kinase is responsible for the phosphorylation of Mis18 $\alpha$ . Taken together, these results indicate that the phosphorylation of Mis18 $\alpha$  is a mitosis-specific event mediated by Aurora B kinase.

### Mis18 $\alpha$ phosphorylation is necessary for faithful mitotic division

To find out the role of Mis18 $\alpha$  phosphorylation, we generated HeLa cells stably expressing shRNA-resistant form of Mis18 $\alpha$  WT (WT<sup>R</sup>) or Mis18 $\alpha$  SA (SA<sup>R</sup>). The knockdown of endogenous Mis18 $\alpha$  was achieved by lentiviral infection of pLKO-shMis18 $\alpha$  just before experiment. The infection of cells with lentivirus reduced the level of endogenous Mis18 $\alpha$  efficiently (Supplementary Figure 3). The specific phosphorylation of reconstituted Mis18 $\alpha$  proteins was validated by immunoblot analysis (Figure 2A). With these reconstituted cell lines, we then checked the cell division and interestingly, the number of cells showing misaligned chromosomes (white arrow) at metaphase increased 2.5-fold in Mis18 $\alpha$  SA-reconstituted cells compared with Mis18 $\alpha$  WT-reconstituted cells (Figure 2B). In addition, either the chromatin bridges or lagging chromatids and micronuclei (white arrow) increased approximately two folds in Mis18 $\alpha$  SA-reconstituted cells than Mis18 $\alpha$  WT-reconstituted cells (Figure 2C).

To verify whether Mis18 $\alpha$  phosphorylation is necessary for mitosis, we next examined the mitotic defects in *Mis18 $\alpha$ <sup>fl/fl</sup>/ESR-Cre* MEFs in which endogenous Mis18 $\alpha$  can be depleted by the treatment with tamoxifen (Figure 2D). *Mis18 $\alpha$ <sup>fl/fl</sup>/ESR-Cre* MEFs were reconstituted with either Mis18 $\alpha$  WT or Mis18 $\alpha$  SA, and we detected mitotic phosphorylation of Mis18 $\alpha$  only in Mis18 $\alpha$  WT-reconstituted MEFs, but not in Mis18 $\alpha$  SA-reconstituted MEFs (Figure 2E). Interestingly, the depletion of endogenous Mis18 $\alpha$  induced an increase of aneuploidy in Mis18 $\alpha$  SA-reconstituted MEFs compared with Mis18 $\alpha$  WT-reconstituted MEFs; especially the population of cells containing the number of chromosome over 4N were increased in Mis18 $\alpha$  SA-reconstituted MEFs compared with Mis18 $\alpha$  WT-reconstituted MEFs (Figure 2F and Supplementary Figure 4). This is consistent with the previous studies that showed Aurora B depletion or overexpression increasing aneuploidy [18, 19]. Furthermore, the depletion of endogenous Mis18 $\alpha$

increased the number of the chromatin bridges or lagging chromatids by four times when compared with untreated control cells (Figure 2G). While Mis18 $\alpha$  WT-reconstitution significantly reduced the chromatin bridges or lagging chromatids formation in *Mis18 $\alpha$* -deficient MEFs, Mis18 $\alpha$  SA-reconstitution failed to do so (Figure 2G and 2H). In addition, the micronuclei formation and chromosome misalignment also increased in *Mis18 $\alpha$* -deficient MEFs and these were not recovered by Mis18 $\alpha$  SA-reconstitution similarly to the chromatin bridges or lagging chromatids formation (Figure 2G, 2I and 2J). However, CENP-A dots were intact indicating that these mitotic defects in Mis18 $\alpha$  SA-reconstituted MEFs are independent of CENP-A deposition. Taken together, mitotic phosphorylation of Mis18 $\alpha$  by Aurora B kinase is necessary both for the faithful segregation of chromosome.

### Mis18 $\alpha$ phosphorylation is not required for CENP-A loading

Since Mis18 $\alpha$  plays a role in CENP-A loading process as a licensing or priming factor [4, 7], we questioned whether the phosphorylation of Mis18 $\alpha$  by Aurora B kinase is important for this function. Therefore, we first checked the Mis18 complex formation which is essential for CENP-A loading process and found that Mis18 $\alpha$  SA has little or no defect in the binding with either Mis18 $\beta$  or M18BP1 (Figure 3A and 3B). Furthermore, Mis18 $\alpha$  WT began to show as dots at centromere from anaphase and stayed there until G1 phase (Figure 3C) as reported previously [4]. Mis18 $\alpha$  SA showed the similar pattern with WT, indicating that Mis18 $\alpha$  phosphorylation at Ser36 by Aurora B kinase is not crucial for its centromere localization.

Next, we examined whether the phosphorylation of Mis18 $\alpha$  is required for the CENP-A loading process by adopting and modifying the experimental scheme that was used to show the prerequisite function of Mis18 $\alpha$  for the centromere loading of newly synthesized CENP-A [4]. HeLa cells stably expressing siRNA-resistant form of Mis18 $\alpha$  WT or Mis18 $\alpha$  SA were transfected with siRNA against Mis18 $\alpha$  to get rid of endogenous Mis18 $\alpha$  and then transfected with GFP-CENP-A as shown in the scheme of Figure 3D. After 24 and 9 hours of siRNA and GFP-CENP-A transfection, respectively, GFP-CENP-A dots were clearly observed at late telophase of both WT and SA-expressing cells (Figure 3D).

We applied an alternative scheme to confirm that Mis18 $\alpha$  phosphorylation is unrelated to CENP-A loading process. In this experiment, we could check the effect of prolonged Mis18 $\alpha$  knockdown and the reconstitution Mis18 $\alpha$  WT or Mis18 $\alpha$  SA on CENP-A loading process. HeLa cells were infected with lentivirus expressing shRNA against Mis18 $\alpha$  and reconstituted with either Mis18 $\alpha$  WT or Mis18 $\alpha$  SA as shown in the scheme of Figure 3E. Cells were synchronized by treating with monastrol and

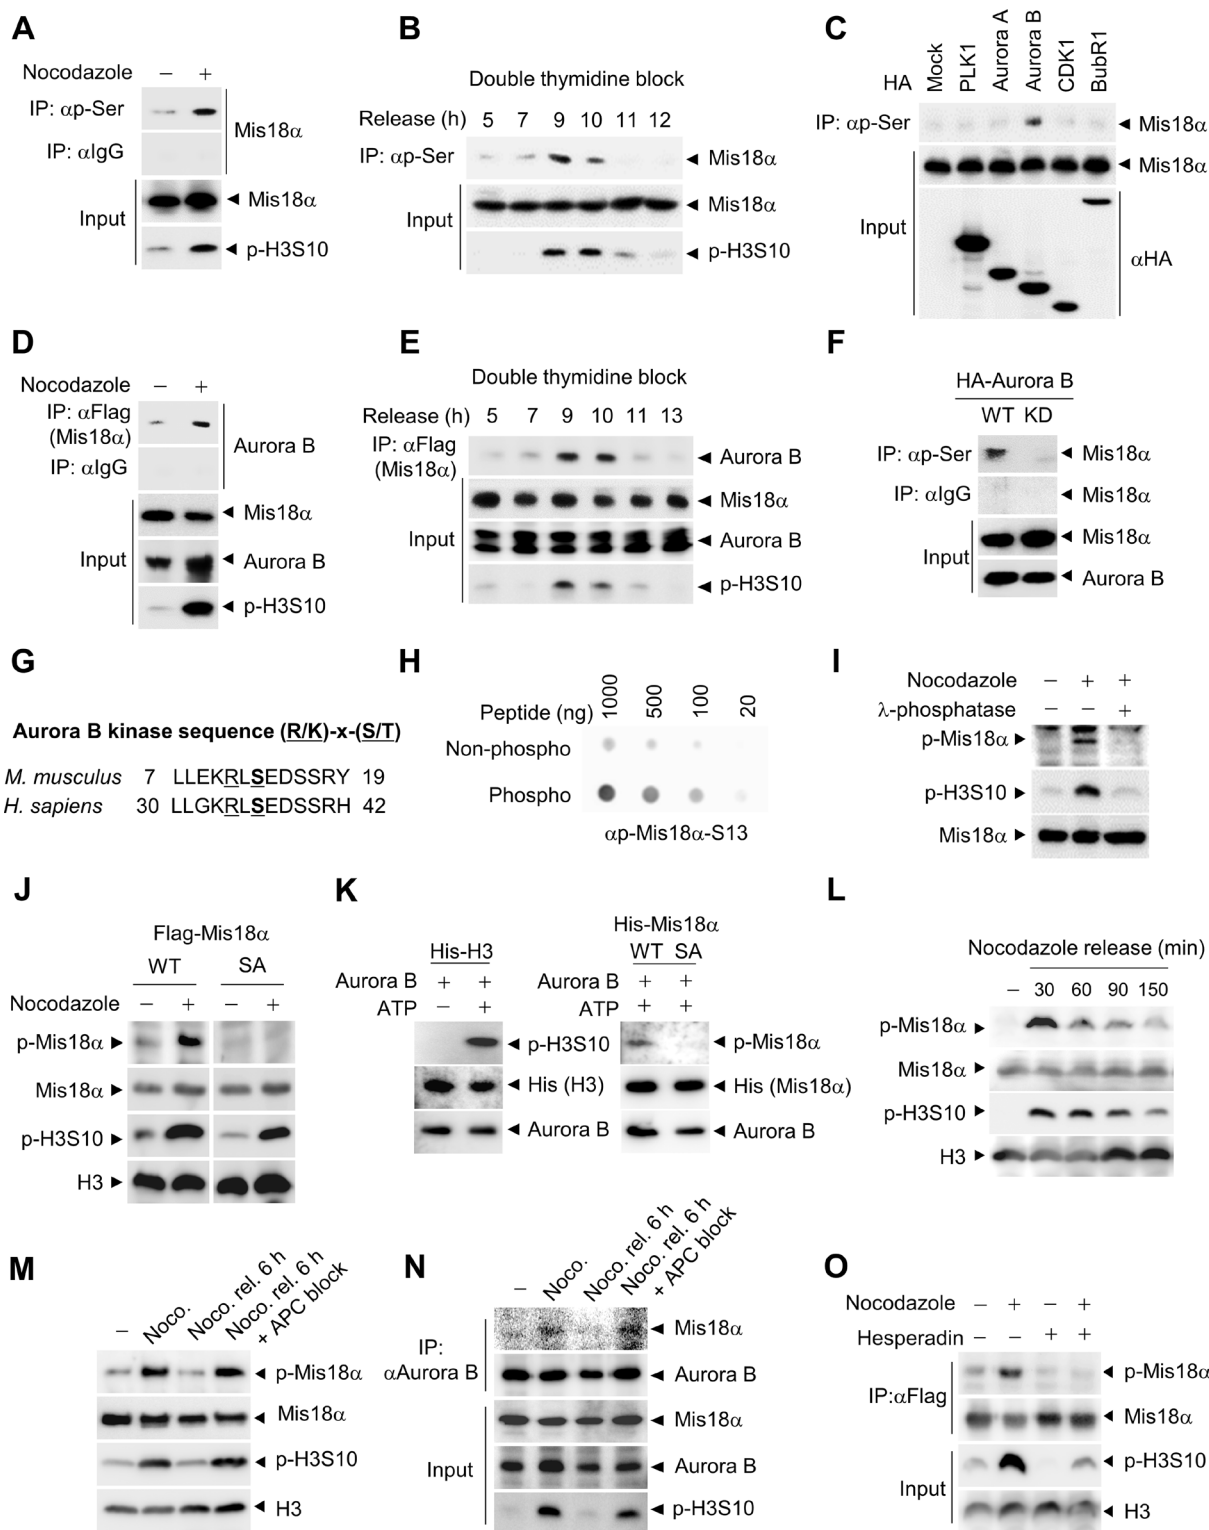

**Figure 1: Mis18 $\alpha$  is phosphorylated during mitosis by Aurora B kinase.** (A) HeLa cells stably expressing Flag-Mis18 $\alpha$  (HeLa/Flag-Mis18 $\alpha$ ) were synchronized by nocodazole treatment. Cell extracts were subjected to immunoprecipitation (IP) with an antibody against phosphorylated-serine (p-Ser) followed by immunoblotting with anti-Flag antibody. Phosphorylation of 10th serine residue of histone H3 (p-H3S10) was used as a mitosis indicator. (B) HeLa/Flag-Mis18 $\alpha$  cells were synchronized at G1/S by double thymidine block and released into indicated time points and were analyzed as in (A). (C) Mitotic kinases were transfected into HeLa/Flag-Mis18 $\alpha$  cells and cell extracts were applied to IP with the anti-p-Ser antibody followed by immunoblotting with anti-Flag antibody. (D) Mitotically arrested HeLa/Flag-Mis18 $\alpha$  cells with nocodazole treatment were applied for IP with anti-Flag antibody and detected with anti-Aurora B antibody. (E) HeLa/Flag-Mis18 $\alpha$  cells prepared as in B were used for IP assay with anti-Flag antibody and detected with anti-Aurora B antibody.

(F) HeLa/Flag-Mis18 $\alpha$  cells transfected with Aurora B wild-type (Aurora B WT) or K160A kinase dead mutant (Aurora B KD) were used for IP with anti-p-Ser antibody. (G) Aurora B kinase consensus sequences in mouse and human Mis18 $\alpha$ . (H) Dot blot analysis for a phosphorylation-specific antibody of Mis18 $\alpha$  on Ser36 (p-Mis18 $\alpha$ ) by comparing non-phospho peptide with phospho-peptide at indicated concentrations. (I) Extracts from 293T cells transfected with Flag-Mis18 $\alpha$  were treated with  $\lambda$ -phosphatase and used for immunoblotting with anti-p-Mis18 $\alpha$  antibody. (J) 293T cells were transfected with Flag-Mis18 $\alpha$  WT, Flag-Mis18 $\alpha$ SA and synchronized by nocodazole treatment. Cell extracts were used for immunoblotting with anti-p-Mis18 $\alpha$  antibody. (K) Recombinant His-H3 or His-Mis18 $\alpha$  were incubated with purified Aurora B kinase in the presence of ATP for 30 min at 30°C for *in vitro* kinase assay. Phosphorylation of Mis18 $\alpha$  was detected using anti-p-Mis18 $\alpha$ . (L) 293T cells expressing Flag-Mis18 $\alpha$  WT were synchronized by nocodazole treatment. After releasing, cells were harvested at indicated time points and applied for immunoblotting. (M) 293T cells expressing Flag-Mis18 $\alpha$  WT were released for 6 h from nocodazole-mediated synchronization with or without MG132 treatment to block APC activity. (N) HeLa/Flag-Mis18 $\alpha$  cells were released for 6 h from nocodazole-mediated synchronization as in M and subject to IP analysis with anti-Aurora B antibody. (O) HeLa/Flag-Mis18 $\alpha$  cells expressing Flag-Mis18 $\alpha$  were treated with Aurora B kinase inhibitor, Hesperadin and the phosphorylation of Mis18 $\alpha$  was evaluated by using anti-p-Mis18 $\alpha$  antibody under nocodazole treatment.

then released for 30 min. With the representative data for prometaphase cells (Figure 3E, left) and G1 phase cells (Figure 3E, right), knockdown of Mis18 $\alpha$  in HeLa cells diminished CENP-A dots dramatically on day 7; only 13% of cells showed positive signal for CENP-A dots compared with the control shRNA-infected cells (Figure 3F). However, reconstitution of Mis18 $\alpha$  WT and Mis18 $\alpha$  SA recovered CENP-A dots approximately up to 80% in centromere. Taken together, we could exclude the effect of Mis18 $\alpha$  phosphorylation on newly synthesized CENP-A loading into centromere.

### Mis18 $\alpha$ phosphorylation enhances PLK1 kinetochore recruitment

Aurora B kinase functions to regulate kinetochore-microtubule attachment during prometaphase and PLK1 is another key regulator for this function with Aurora B kinase [14, 20]. To achieve accurate microtubule binding to kinetochore, Aurora B kinase and PLK1 phosphorylate each substrate at a balanced level for microtubule dynamics. If either kinase is abnormally activated, the cells divide with abnormal microtubule binding inducing misaligned chromosomes [14, 20]. We questioned whether the mitotic defects shown in Mis18 $\alpha$  SA-reconstituted cells are caused by dysregulation of PLK1 at the kinetochore during prometaphase. Based on this hypothesis, we examined PLK1 recruitment to the kinetochore during prometaphase compared to *Mis18 $\alpha$* -depleted HeLa cells. Mis18 $\alpha$  knockdown was validated by the disappearance of CENP-A dots, while anti-centromere antibody (ACA) recognized centromere regions in the chromosomes (Figure 4A). In control cells, PLK1 dots were clearly stained consistently with centromere markers, whereas the intensity of PLK1 dots was significantly reduced at the kinetochore in *Mis18 $\alpha$* -knockdown cells (Figure 4B), indicating that Mis18 $\alpha$  is necessary for the proper recruitment of PLK1 to the kinetochore. Interestingly, introduction of Mis18 $\alpha$  WT recovered the intensity of PLK1 dots; however, introduction of Mis18 $\alpha$  SA was not sufficient to substitute for Mis18 $\alpha$  WT (Figure 4C). The evaluation of the ratio of PLK1 dots to ACA centromere maker confirmed that Mis18 $\alpha$  phosphorylation is necessary for the proper recruitment of PLK1 to kinetochore (Figure 4D). Since Aurora B

is also responsible for PLK1 activation at kinetochore through Thr210 phosphorylation [14], we next checked whether Mis18 $\alpha$  phosphorylation is also involved in it. Interestingly, Thr210 phosphorylation of PLK1 was also decreased in Mis18 $\alpha$  SA-reconstituted cells, indicating that Mis18 $\alpha$  phosphorylation is essential for the function of PLK1 at kinetochore (Figure 4E). Moreover, Mis18 $\alpha$  SD, a phospho-mimic form, recovered and further maintained PLK1 recruitment even during the metaphase when PLK1 starts to leave kinetochore [20] (Figure 4F). The level of PLK1 in Mis18 $\alpha$  WT- or Mis18 $\alpha$  SA-reconstituted cells was comparable, indicating that reduced kinetochore recruitment of PLK1 in Mis18 $\alpha$  SA-reconstituted cells is not related to its protein level (Figure 4G). Taken together, these results indicate that Mis18 $\alpha$  phosphorylation by Aurora B kinase is necessary for the PLK1 kinetochore localization at early mitosis.

### PLK1 recognizes Mis18 $\alpha$ phosphorylation through its Polo Box Domain (PBD)

To examine whether Mis18 $\alpha$ -PLK1 binding is important for PLK1 kinetochore recruitment and whether Mis18 $\alpha$  phosphorylation mediates the binding, we performed co-immunoprecipitation assay. Interestingly, PLK1 bound with Mis18 $\alpha$  WT, but the binding with Mis18 $\alpha$  SA decreased significantly (Figure 5A). In addition, the binding between PLK1 and Mis18 $\alpha$  SD phospho-mimic mutant increased more than Mis18 $\alpha$  WT (Figure 5B). *In vitro* binding assay was also performed to confirm if Mis18 $\alpha$  phosphorylation is necessary for its interaction with PLK1. Mis18 $\alpha$  interacted with PLK1 only in the presence of ATP and Aurora B kinase, whereas Mis18 $\alpha$  SA did not bind with PLK1 even in the presence of ATP and Aurora B kinase (Figure 5C). In a separate assay, phosphorylation mimic mutant form of Mis18 $\alpha$  (Mis18 $\alpha$  SD) interacted with PLK1 without addition of Aurora B kinase (Supplementary Figure 5). Furthermore, knockdown of Aurora B kinase diminished the binding between PLK1 and Mis18 $\alpha$  (Figure 5D), and overexpression of Aurora B kinase increased their binding (Figure 5E), revealing Aurora B kinase dependent binding of PLK1. Nocodazole treatment increased the binding between PLK1 and Mis18 $\alpha$  (Figure 5F). Thus,

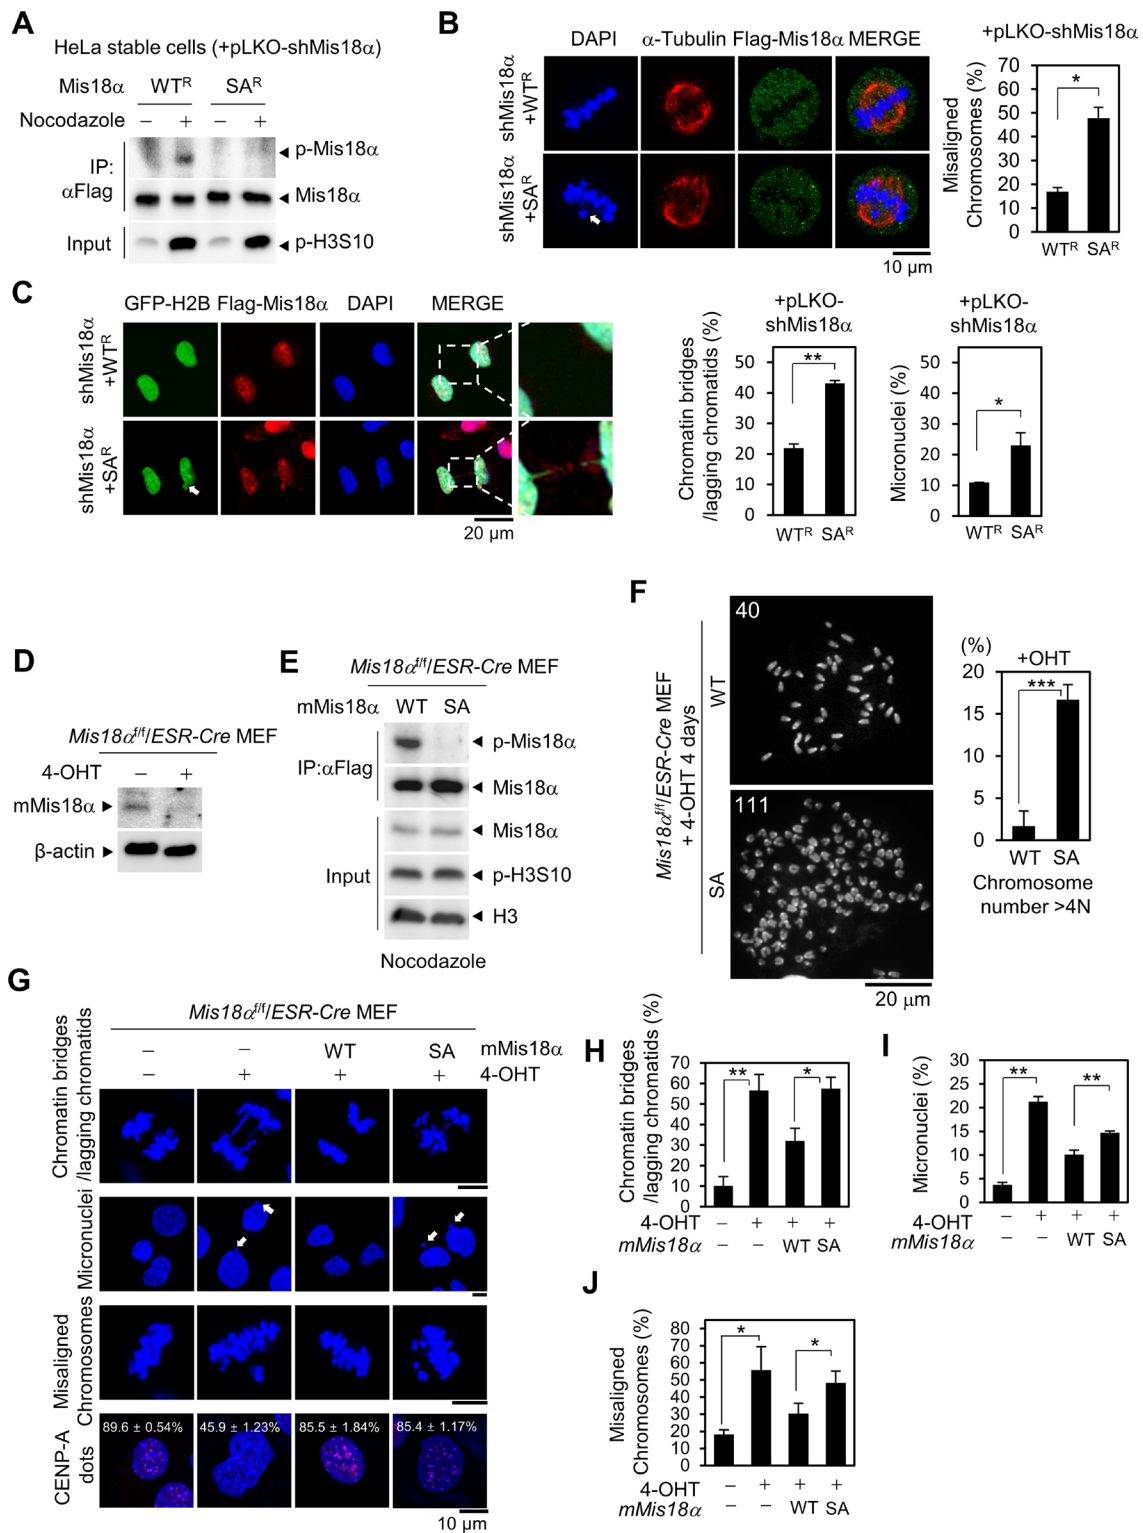

**Figure 2: Mis18 $\alpha$  phosphorylation is necessary for faithful mitotic division.** (A) Immunoblotting for Mis18 $\alpha$  phosphorylation in nocodazole-synchronized HeLa/Flag-Mis18 $\alpha$  stable cells. WT<sup>R</sup> or SA<sup>R</sup> represents shRNA-resistant form of Mis18 $\alpha$  proteins. (B) Images of misaligned chromosomes in HeLa/Flag-Mis18 $\alpha$  stable cells (left) and the number of cells showing misaligned chromosomes presented in percentage (right). *P* value is calculated by *t*-test (*\*p* < 0.05). (C) Images of the chromatin bridges or lagging chromatids and micronuclei in HeLa/Flag-Mis18 $\alpha$  stable cells (left) and the number of cells showing the chromatin bridges or lagging chromatids presented in percentage (right). *P* value is calculated by *t*-test (*\*p* < 0.05). (D) *Mis18 $\alpha$ <sup>fl/fl</sup>/ESR-Cre* MEFs were treated with 4-hydroxy-tamoxifen (4-OHT) for four days and the depletion of endogenous mMis18 $\alpha$  was validated by immunoblot using anti-mMis18 $\alpha$  antibody. (E) The phosphorylation of mMis18 $\alpha$  proteins in *Mis18 $\alpha$ <sup>fl/fl</sup>/ESR-Cre* MEFs reconstituted with Flag-mMis18 $\alpha$  WT or Flag-mMis18 $\alpha$  SA were validated by

immunoblotting with anti-p-Mis18 $\alpha$  antibody. (F) Reconstituted *Mis18 $\alpha$ <sup>off</sup>/ESR-Cre* MEFs were analyzed by chromosome spreading assay. Histogram in right side shows the percentage of cells containing chromosome number over 4 N for each genotype. The number of chromosome spreads is 120 each and chromosomes were counted using Image J software by identifying the centromeres, the brighter part than the rest of the chromosome. *P* value is calculated by *t*-test (\*\**p* < 0.001). (G) The chromatin bridges or lagging chromatids, micronuclei and misaligned chromosomes were analyzed in reconstituted *Mis18 $\alpha$ <sup>off</sup>/ESR-Cre* MEFs in parallel with CENP-A dots. (H–J) The percentage of cells showing the chromatin bridges or lagging chromatids (H), micronuclei (I), and misaligned chromosomes (J) was calculated from the images in G. *P* value is calculated by *t*-test (\**p* < 0.05, \*\**p* < 0.01).

phosphorylation of Mis18 $\alpha$  enhances its binding with PLK1.

PLK1 localization is enhanced by phospho-binding domain, called Polo Box Domain (PBD) [21, 22]. PLK1 recognizes substrates through its PBD, and substrate binding through PBD leads to further activation of PLK1. Therefore, we checked whether the PBD of PLK1 is involved in the binding with the phosphorylated Mis18 $\alpha$ . Since two sites (His538 and Lys540) in PBD are important for the binding of PLK1 to other substrates [23], we generated PLK1 AA mutant by substituting each amino acid to alanine. Interestingly, the binding of PLK1 AA with Mis18 $\alpha$  decreased considerably compared to PLK1 WT (Figure 5G). PLK1 AA mutant also exhibited decreased binding to Aurora B kinase (Figure 5H). To gain more insight into PLK1 and Mis18 $\alpha$  interaction, we performed bimolecular fluorescence complementation assay [24]. The N-terminal half and the C-terminal half of VENUS were fused with Mis18 $\alpha$  and PLK1, respectively. When the two proteins were co-expressed, Mis18 $\alpha$ /PLK1 interaction-mediated complementation of VENUS showed green fluorescence signals. However, Mis18 $\alpha$  SA or PLK1 AA mutant failed to show any fluorescence signal (Figure 5I). Taken together, PLK1 binds to phosphorylated Mis18 $\alpha$  through its PBD and the binding enhances PLK1 recruitment to the kinetochore at prometaphase (Figure 6).

## DISCUSSION

Mis18 $\alpha$  is a component of Mis18 complex that is crucial for centromere deposition of newly synthesized CENP-A at early G1 phase of cell cycle [4, 6]. In this study, we identified a distinct role of Mis18 $\alpha$  at mitosis, independent of its known function in CENP-A deposition at early G1 phase. The mitotic function of Mis18 $\alpha$  is accompanied by Aurora B kinase-mediated phosphorylation on a conserved serine residue (Ser36 in human and Ser13 in mouse) during mitosis and this phosphorylation enhances the interaction between Mis18 $\alpha$  and PLK1 resulting in the increased kinetochore recruitment of PLK1. The Mis18 $\alpha$  phosphorylation we have shown here is distinct from previously identified phosphorylations of Mis18 proteins by CDK1/2 and PLK1, which mainly regulate the function for CENP-A deposition. First, it occurs during mitosis specifically by Aurora B kinase, and the association with Mis18BP1 is not necessary for the phosphorylation. Second and most importantly, the phosphorylation is independent of CENP-A loading. Phosphorylation-defective mutation of

Mis18 $\alpha$  does not affect either timely scheduled centromere localization of Mis18 complex during cell cycle progression or its function as a priming factor for CENP-A deposition. In detail, the replacement of endogenous Mis18 $\alpha$  with phosphorylation-defective Mis18 $\alpha$  in two cell types, HeLa and MEFs, did not induce CENP-A loss, whereas Mis18 $\alpha$  depletion without Mis18 $\alpha$  reconstitution clearly caused CENP-A loss.

It has been previously shown that the depletion of Mis18 $\alpha$  causes mitotic defects such as misaligned chromosomes and chromosomal bridges [3], which finally leads to cell death resulting in developmental failure of embryos and skin stratification in mice [3, 5]. Interestingly, the expression of phosphorylation-defective mutant form of Mis18 $\alpha$  in *Mis18 $\alpha$ -depleted* cells can rescue severe lethal phenotype of *Mis18 $\alpha$*  depletion; however, still exhibits mitotic defects, indicating that although the phosphorylation is not critical for CENP-A deposition, it contributes to the faithful chromosome alignment and segregation. Indeed, Aurora B kinase and PLK1 are essential kinases for accurate KT-MT attachment by interdependent regulation and the loss of Aurora B kinase activity is known to cause abnormally stable KT-MT attachment, as the cooperation with PLK1 to balance KT and MT tension is collapsed [25–28]. This results in abnormally increased inter-kinetochore distance [29]. Aurora B kinase destabilizes KT-MT attachment, whereas PLK1 stabilizes it by phosphorylating BubR1 to disturb Aurora B kinase activity [25]. However, PLK1 activates Aurora B kinase by phosphorylating Survivin, which is a member of chromosomal passenger complex and Aurora B kinase activates PLK1 by direct phosphorylation [14, 15]. Due to this complicated cooperation, cells may have multilayers of self-checking system for accurate KT-MT attachment and Mis18 $\alpha$  phosphorylation by Aurora B kinase would have a role of enhancing PLK1 recruitment.

The most striking feature of PLK1 regulation is PBD-dependent interaction with its substrates resulting in the kinetochore localization. There are many studies on the proteins that recruit PLK1 to the kinetochore by investigating their interaction with PBD. The PBIP1 recruits PLK1 by PBD-mediated binding at early mitosis and PLK1 phosphorylates PBIP1 for self-primed enrichment [30]. Interestingly, PLK1-mediated phosphorylation of PBIP1 on another site induces its degradation and releases PLK1 for the interaction with other recruiting factors. Indeed, PLK1 kinetochore signals remain even when the PBIP1 is depleted [31], indicating multilayered regulation of PLK1 kinetochore

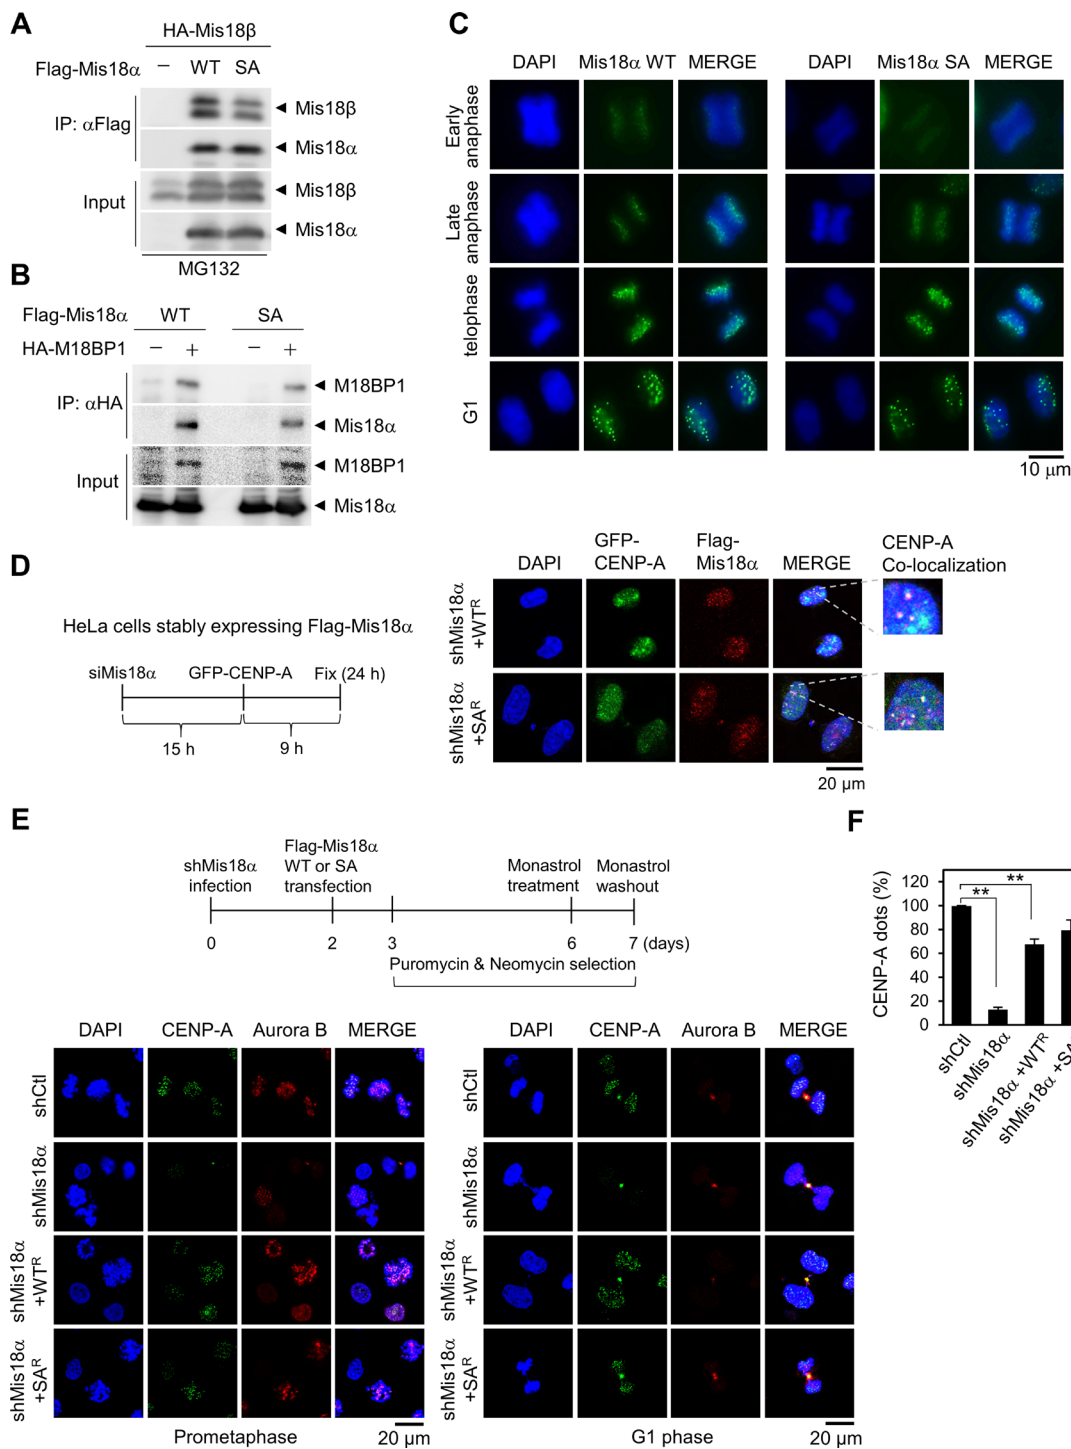

**Figure 3: Mis18 $\alpha$  phosphorylation is not required for CENP-A loading.** (A) HA-Mis18 $\beta$  with either Flag-Mis18 $\alpha$  WT or Flag-Mis18 $\alpha$  SA was transfected into 293T cells and the extracts were applied for co-IP assay. (B) The binding between Flag-Mis18 $\alpha$  and HA-M18BP1 was analyzed as in A. (C) HeLa/Flag-Mis18 $\alpha$  stable cells were synchronized by double-thymidine block and released into indicated phase. The cells were stained with anti-Flag antibody. The green dots indicate centromeric localization of Mis18 $\alpha$ . Confocal image with 1,000x magnification. (D) Analysis scheme for the centromere recruitment of newly synthesized CENP-A (left). HeLa cells stably expressing siRNA-resistant form of Mis18 $\alpha$  WT (WT<sup>R</sup>) or SA (SA<sup>R</sup>) were transfected sequentially with siRNA against Mis18 $\alpha$  and with GFP-CENP-A (mimic newly synthesized CENP-A) as indicated in the scheme. Immunocytochemistry for Mis18 $\alpha$  with anti-Flag antibody and GFP-CENP-A (right). (E) Scheme for the centromeric recruitment of CENP-A under prolonged Mis18 $\alpha$  knockdown (upper). Knockdown of endogenous Mis18 $\alpha$  was achieved by infecting lentivirus that is expressing shRNA against Mis18 $\alpha$ . Lower left panel shows CENP-A dots in prometaphase cells and lower right panel represents G1 phase cells. (F) The number of CENP-A dot positive cells from E were calculated and expressed as a percentage of total cells. *P* value is calculated by *t*-test (\*\**p* < 0.01).



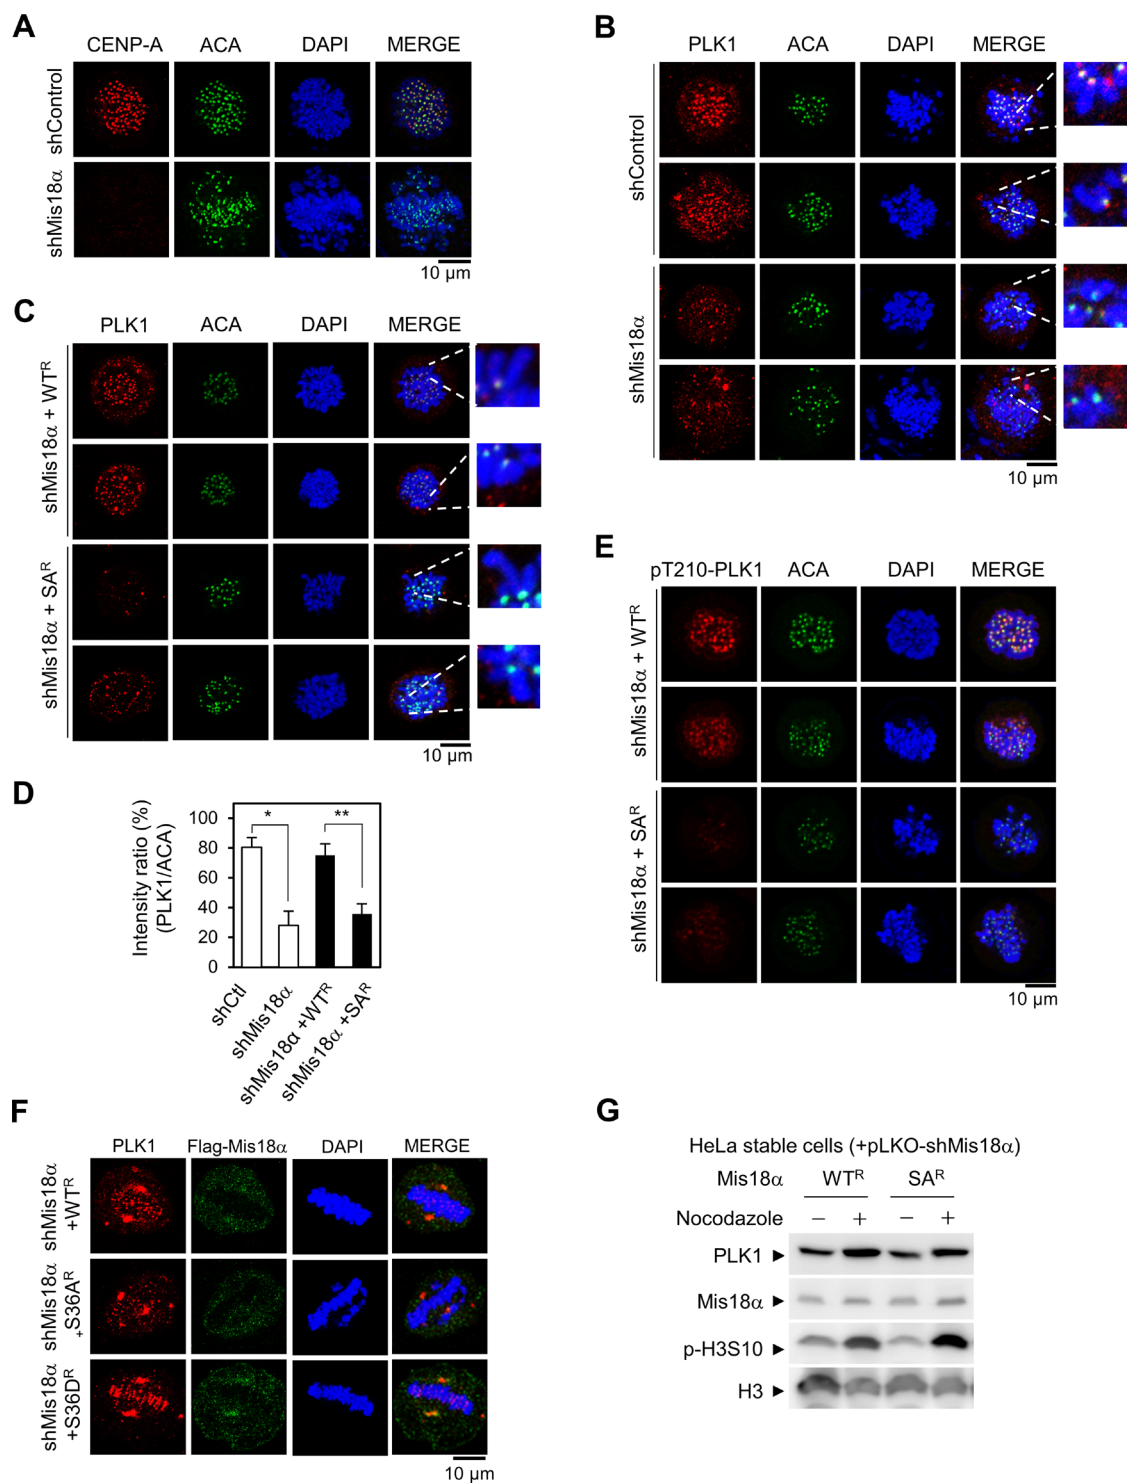

**Figure 4: Mis18 $\alpha$  phosphorylation enhances PLK1 kinetochore recruitment.** (A) HeLa cells were infected with lentivirus expressing either control shRNA (shControl) or shRNA against Mis18 $\alpha$  (shMis18 $\alpha$ ). Cells were fixed at prometaphase by releasing for 30 min after monastrol treatment and stained with anti-ACA (centromere marker) or anti-CENP-A antibody. Confocal image with 1,000 $\times$  magnification. (B) Cells prepared as in A were co-stained with anti-PLK1 and anti-ACA antibodies. (C) HeLa cells stably expressing shRNA-resistant form of Mis18 $\alpha$  (WT<sup>R</sup> and SA<sup>R</sup>) were infected with lentivirus expressing shMis18 $\alpha$ . Cells were co-stained with anti-PLK1 and anti-ACA antibodies at prometaphase. (D) The number of cells showing high intensity of PLK1 staining, ACA signal as a control (PLK1/ACA), from B and C was presented in percentage. *P* value is calculated by *t*-test (\**p* < 0.05, \*\**p* < 0.01). (E) pThr210-PLK1 was co-stained with ACA in the same cells as C. (F) HeLa cells stably expressing shRNA-resistant form of Mis18 $\alpha$  (WT<sup>R</sup>, SA<sup>R</sup> and SD<sup>R</sup>) were co-stained with anti-PLK1 and anti-Flag Mis18 $\alpha$  antibody at metaphase. (G) Immunoblot for PLK1 level in reconstituted HeLa stable cell lines.

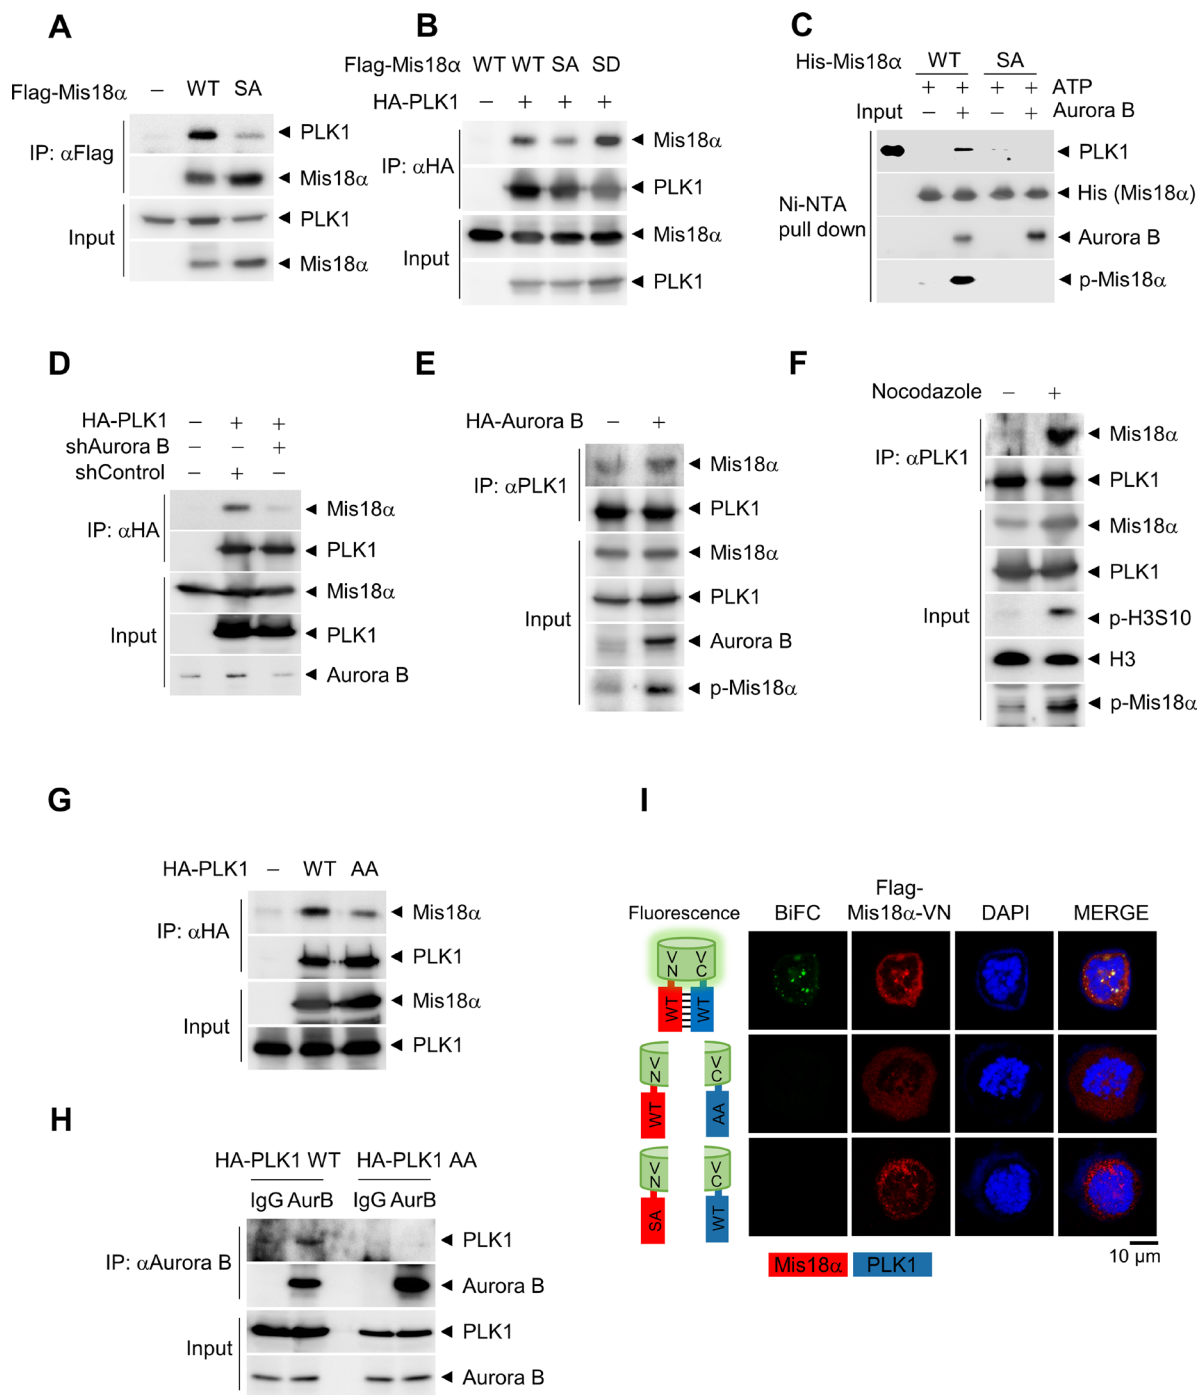

**Figure 5: PLK1 recognizes Mis18α phosphorylation through its PBD.** (A) Flag-Mis18α and HA-PLK1 constructs were transfected in 293T cells and cell extracts were applied for IP analysis by using anti-Flag antibody. (B) Flag-Mis18α and HA-PLK1 constructs were transfected in 293T cells and cell extracts were applied for IP analysis by using anti-HA antibody. (C) HA-PLK1 was synthesized *in vitro* by using a coupled Transcription/Translation system and incubated with recombinant His-Mis18α in the presence of Aurora B kinase for *in vitro* binding assay. The sample was subjected to immunoblotting with anti-HA antibody. (D) 293T cells were transfected as in A in the presence or absence of shRNA against Aurora B kinase. IP was performed by using anti-HA antibody. (E–F) Flag-Mis18α constructs were transfected in 293T cells in the presence of Aurora B kinase overexpression (E) or nocodazole treatment (F), and IP was performed by using anti-PLK1 antibody. (G) Flag-Mis18α was transfected into 293T cells together with either wild-type PLK1 (HA-PLK1 WT) or PBD-mutant form of PLK1 (HA-PLK1 AA). IP was performed using anti-HA antibody. (H) 293T cell extracts expressing either HA-PLK1 WT or HA-PLK1 AA were applied for IP analysis using anti-Aurora B kinase antibody. (I) Bimolecular fluorescence complementation assay. Flag-Mis18α-VN constructs and HA-PLK1-VC constructs were transfected into HeLa cells and the fluorescence images were detected under confocal microscope (green fluorescence for BiFC and red fluorescence for Mis18α). Confocal image with 1,000× magnification.

recruitment. In addition, INCENP and RSF1 are known to function in PLK1 kinetochore recruitment. Knockdown of INCENP, which is a member of passenger complex with Aurora B kinase, resulted in the loss of PLK1 kinetochore recruitment [32] providing the evidence of Aurora B complex's involvement in PLK1 recruitment. RSF1 partially regulates PLK1 kinetochore recruitment and dual knockdown of RSF1 and INCENP further reduces PLK1 kinetochore recruitment [33]. In our study, Mis18 $\alpha$  SA reconstitution did not completely inhibit PLK1 recruitment to the kinetochore. Moreover, there was no obvious mitotic delay. Therefore, we speculate that the mitotic defects observed from Mis18 $\alpha$  SA-reconstituted cells would be the accumulated defects from prolonged dysregulation of PLK1.

In summary, we have identified mitosis-specific phosphorylation of Mis18 $\alpha$  by Aurora B kinase, which is not essential for the previously known function of Mis18 complex in CENP-A deposition to centromere. Instead, the phosphorylation of Mis18 $\alpha$  contributes the recruitment of PLK1 to the kinetochore, which requires PBD-mediated binding of phosphorylated Mis18 $\alpha$  at prometaphase. Since the phosphorylation-defective mutation on Mis18 $\alpha$  causes mitotic problems, Mis18 $\alpha$  plays a critical role in mitosis in addition to its well-known function in CENP-A deposition at G1 phase. Our finding opens up a possibility that Mis18 $\alpha$  may play a diverse role in a wide range of cell cycle regulation.

## MATERIALS AND METHODS

### Cell culture, generation of stable cells and transfection

HeLa, 293T and Mis18 $\alpha^{fl}/ESR-Cre$  MEFs were cultured in 37°C humidified CO<sub>2</sub> incubator with DMEM containing 10% FBS and antibiotics. All cell lines were regularly tested for mycoplasma contamination. For the generation of Mis18 $\alpha$ -stably reconstituted HeLa cell

lines, cells transfected with shRNA-resistant Flag-Mis18 $\alpha$  were selected with neomycin for two weeks. The cells were then infected with shMis18 $\alpha$  expressing lentivirus (pLKO-shMis18 $\alpha$ ) followed by selection with puromycin. Lentivirus was generated by transfecting lentiviral shRNA and packaging plasmids (psPAX2 and pMD2.G) into 293T cells. The culture supernatant were collected two days later and concentrated by Lenti-concentrator (Takara Bio, USA). The targeting sequences of shRNA are as follows; human Mis18 $\alpha$ , 5'-CAGAAGCTATCCAAACGTG-3'; human M18BP1, 5'-GGATATCCAAATTATCTCA-3'. The targeting sequence of siRNA for human Mis18 $\alpha$  is as follows; 5'-CAGAAGCUAUCCAAACGUGUU-3'. For the generation of Mis18 $\alpha$ -reconstituted Mis18 $\alpha^{fl}/ESR-Cre$  MEF cell lines, cells were infected with Flag-mMis18 $\alpha$  expressing lentivirus (pLJM1-Flag-Mis18 $\alpha$ ) and selected with puromycin for two weeks. For the depletion of endogenous mMis18 $\alpha$ , 4-hydroxy-tamoxifen (200 nM) was added for 4 days.

### Cell synchronization

To arrest cells at G1/S, the cells were incubated with DMEM media containing 4 mM thymidine (Sigma, St Louis, MO) for 16 h and were washed with PBS twice. After 9 h of release, cells were incubated with thymidine containing media again for 15 h, and were released and harvested at indicated time points. To arrest cells at metaphase, the cells were incubated with DMEM media containing 0.4  $\mu$ g nocodazole (Sigma, St Louis, MO) for 15 h. For metaphase-aligned chromosomes, MG132 (Sigma, St Louis, MO) was added while cells were released from 100 nM monastrol incubation for 15 h.

### Bimolecular fluorescence complementation assay

The N-terminal half of Venus fluorescent protein with Flag-tag was fused with Mis18 $\alpha$  and the C-terminal half of Venus with HA-tag was fused with PLK1.

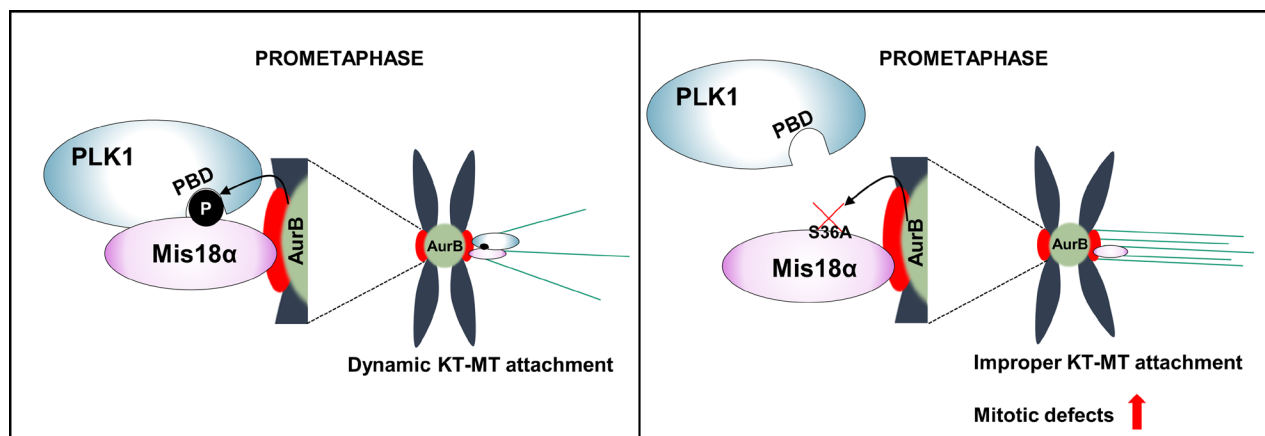

**Figure 6: Mis18 $\alpha$  function during mitosis by enhancing PLK1 kinetochore recruitment.** A schematic model showing how Mis18 $\alpha$  phosphorylation enhances PLK1 recruitment at the kinetochore.

Phosphorylation-defective mutant of Mis18 $\alpha$  and PBD mutant of PLK1 were fused with Venus in the same way, respectively. These constructs were transfected into HeLa cells in combination. The cells were synchronized by monastrol treatment and then released to obtain prometaphase population. The expression of each construct was validated by immunostaining with anti-Flag or anti-HA antibodies. The complemented Venus protein was detected by green fluorescence signal using a confocal microscope (Carl Zeiss, Germany).

### Immunoprecipitation

The whole cell lysates were prepared using lysis buffer (50 mM Tris-HCl pH 8.0 containing 200 mM NaCl, 0.5% NP-40, and freshly added protease and phosphatase inhibitors). Cell lysates were briefly sonicated to shear the chromatin structure. For immunoprecipitation, 1 mg of lysates were incubated sequentially with primary antibody for 4 h followed by protein A/G coated beads for 1 h at 4°C.

### Immunoblot

For immunoblot, normalized cell lysates or immunoprecipitation samples were separated on SDS-PAGE gels and transferred on nitrocellulose membrane (GE Healthcare, Little Chalfont, UK). The blots were probed with the following primary antibodies; anti-Flag (Sigma, St Louis, MO), anti-HA (Covance, Princeton, NJ), anti-H3 (Cell signaling, Danvers, MA), anti-p-H3S10 (Abcam, Cambridge, UK), anti-Aurora B (Abcam, Cambridge, UK), anti-PLK1 (Santa Cruz, Dallas, TX), anti-ACA (Antibodies Incorporated, Davis, CA), anti-CENP-A (Cell Signaling, Danvers, MA), anti-phosphoserine (Sigma, St Louis, MO). Phosphorylation-specific antibody for Mis18 $\alpha$  was generated by injecting synthetic phospho-peptide to rabbits and purified using phospho-peptide affinity chromatography (AbClone, Seoul, South Korea). Peptide sequence used for injection is as follows; 5'-CESPLLEKRL(pS)EDSSR-3'.

### Immunocytochemistry

For immunocytochemistry, the cells were cultured on poly-L-Lysine coated coverslip or chamber slide and were fixed with 2% formaldehyde for 15 min at 25°C. Cells were then permeabilized with PBS containing 0.5% Triton X-100 for 5 min followed by incubation with primary antibodies for overnight. After washing, secondary antibodies conjugated with Alexa Fluor 488 or 594 (Invitrogen, Carlsbad, CA) were applied in the dark for 1 h at 25°C. DAPI was incubated for short time just before mounting and the slides were observed with confocal microscope (Carl Zeiss, Germany) at 1,000 $\times$  magnification with immersion oil. The images were analyzed by Image J software.

### *In vitro* binding assay

HA-PLK1 was synthesized *in vitro* by using a coupled transcription and translation systems (Promega, USA). HA-PLK1 was incubated with recombinant GST-Mis18 $\alpha$  for GST-pull down in binding buffer (125 mM NaCl, 20 mM Tris-HCl pH 8.0, 10% Glycerol, 0.1% NP-40, 0.5 mM DTT and protease inhibitors). The reaction was stopped by adding SDS sampling buffer and was subjected to SDS-PAGE. PLK1 was analyzed by immunoblotting with anti-HA antibody. Amount of GST-Mis18 $\alpha$  was analyzed by anti-GST antibody.

### *In vitro* kinase assay

Recombinant His-H3 and His-Mis18 $\alpha$  was incubated with purified Aurora B kinase (Eurofins, UK) for 30 min at 30°C in the kinase buffer (50 mM Tris-HCl, 10 mM MgCl<sub>2</sub>, 1 mM EGTA, 2 mM DTT, 0.01% Tween-20, 1 mM ATP, protease inhibitors and phosphatase inhibitors). The reaction was stopped by adding SDS sampling buffer and subjected to SDS-PAGE followed by immunoblotting with anti-p-H3S10 antibody and anti-p-Mis18 $\alpha$  antibody.

### *In vitro* kinase-binding assay

Recombinant His-Mis18 $\alpha$  that is bound on Ni-NTA-agarose was incubated with purified Aurora B kinase (Eurofins, UK) for 30 min at 30°C in the kinase buffer. The sample was washed with binding buffer and then incubated with *in vitro* synthesized HA-PLK1 in binding buffer for 2 h with rotating. After collecting the beads and washing with binding buffer, samples were boiled for 5 min with SDS sampling buffer and subjected to SDS-PAGE. PLK1 was analyzed by immunoblotting with anti-HA antibody.

### Chromosome spreading assay

Mis18 $\alpha^{ff}/ESR-Cre$  WT MEFs and Mis18 $\alpha^{ff}/ESR-Cre$  SA MEFs were incubated with colcemid (Sigma, USA) to a final concentration of 1  $\mu$ g/ml for 4 h at 37°C. After incubation, cells were trypsinized and harvested by centrifugation at 1,000 rpm for 4 min. The pellet was resuspended with 75 mM KCl solution and incubated for 6 min. After harvesting by centrifugation at 1,000 rpm for 4 min, cells were fixed with methanol/glacial acetic acid (3:1) by dropping and mixing slowly. The fixed chromosomes were released as a single drop at a time onto the slide and were allowed to air-dry. The air-dried slide was covered by coverslip with DAPI-containing mounting solution. The image was observed by confocal microscope (Carl Zeiss, Germany) at 1,000 $\times$  magnification, and centromeres that are brighter than the rest of the chromosome were counted by Image J software.

## Statistical analysis

All experiments were performed independently at least three times. More than 100 cells were counted to evaluate mitotic defects in each experiment. For PLK1/ACA intensity ratio, an average number of 150 kinetochores was examined for each group. Values are expressed as mean  $\pm$  s.e.m. Significance was analyzed using two-tailed, unpaired *t*-test.  $P < 0.05$  was considered statistically significant.

## Abbreviations

Microtubule (MT), Kinetochore (KT), Spindle Assembly Checkpoint (SAC), Polo Box Domain (PBD), Mitosis (M).

## Author contributions

M.L., I.S.K., K.I.K. and S.H.B. designed the study; M.L. and I.S.K. performed the cell biology experiments; M.L. performed the immunocytochemistry analysis and *in vitro* assays; K.C.P. generated *Mis18a<sup>off</sup>/ESR-Cre* MEFs; J.S.K. performed LC-MS/MS analysis; M.L., K.I.K. and S.H.B. wrote the manuscript; all authors contributed to data analysis.

## ACKNOWLEDGMENTS AND FUNDING

This work was supported by Creative Research Initiatives Program (Research Center for Chromatin Dynamics, 2009-0081563) to S.H.B.; the Science Research Center program (Cellular Heterogeneity Research Center, NRF-2016R1A5A1011974) to K.I.K. from the National Research Foundation (NRF) grant funded by the Korea government (MSIP); Seoul Science fellowship and Brain Korea 21 fellowship to M.K.L. We thank K.E.P. for critical reading of our manuscript.

## CONFLICTS OF INTEREST

None.

## REFERENCES

1. Lesage B, Qian J, Bollen M. Spindle checkpoint silencing: PP1 tips the balance. *Curr Biol.* 2011; 21:R898–903.
2. Cleveland DW, Mao Y, Sullivan KF. Centromeres and kinetochores: from epigenetics to mitotic checkpoint signaling. *Cell.* 2003; 112:407–21.
3. Kim IS, Lee M, Park KC, Jeon Y, Park JH, Hwang EJ, Jeon TI, Ko S, Lee H, Baek SH, Kim KI. Roles of *Mis18a* in epigenetic regulation of centromeric chromatin and CENP-A loading. *Mol Cell.* 2012; 46:260–73.
4. Fujita Y, Hayashi T, Kiyomitsu T, Toyoda Y, Kokubu A, Obuse C, Yanagida M. Priming of centromere for CENP-A recruitment by human *hMis18a*, *hMis18β*, and *M18BP1*. *Dev Cell.* 2007; 12:17–30.
5. Park KC, Lee M, Jeon Y, Jeon R, Baek SH, Lee H, Kim KI. Skin-specific deletion of *Mis18a* impedes proliferation and stratification of epidermal keratinocytes. *J Invest Dermatol.* 2017; 137:414–21.
6. Silva MC, Jansen LE. At the right place at the right time: novel CENP-A binding proteins shed light on centromere assembly. *Chromosoma.* 2009; 118:567–74.
7. Silva MC, Bodor DL, Stellfox ME, Martins NM, Hohegger H, Foltz DR, Jansen LE. Cdk activity couples epigenetic centromere inheritance to cell cycle progression. *Dev Cell.* 2012; 22:52–63.
8. McKinley KL, Cheeseman IM. Polo-like kinase 1 licenses CENP-A deposition at centromeres. *Cell.* 2014; 158:397–411.
9. Hirota T, Kunitoku N, Sasayama T, Marumoto T, Zhang D, Nitta M, Hatakeyama K, Saya H. Aurora-A and an interacting activator, the LIM protein ajuba, are required for mitotic commitment in human cells. *Cell.* 2003; 114:585–98.
10. Berdnik D, Knoblich JA. Drosophila Aurora-A is required for centrosome maturation and actin-dependent asymmetric protein localization during mitosis. *Curr Biol.* 2002; 12:640–7.
11. Fu J, Bian M, Jiang Q, Zhang C. Roles of Aurora kinases in mitosis and tumorigenesis. *Mol Cancer Res.* 2007; 5:1–10.
12. Lampson MA, Cheeseman IM. Sensing centromere tension: Aurora B and the regulation of kinetochore function. *Trends Cell Biol.* 2011; 21:133–40.
13. Cheeseman IM, Anderson S, Jwa M, Green EM, Kang JS, Yates Iii JR, Chan CSM, Drubin DG, Barnes G. Phosphoregulation of kinetochore-microtubule attachments by the Aurora kinase Ipl1p. *Cell.* 2002; 111:163–72.
14. Shao H, Huang Y, Zhang L, Yuan K, Chu Y, Dou Z, Jin C, Garcia-Barrio M, Liu X, Yao X. Spatiotemporal dynamics of Aurora B-PLK1-MCAK signaling axis orchestrates kinetochore bi-orientation and faithful chromosome segregation. *Sci Rep.* 2015; 5:12204.
15. Chu Y, Yao PY, Wang W, Wang D, Wang Z, Zhang L, Huang Y, Ke Y, Ding X, Yao X. Aurora B kinase activation requires survivin priming phosphorylation by PLK1. *J Mol Cell Biol.* 2011; 3:260–7.
16. Sessa F, Mapelli M, Ciferri C, Tarricone C, Areces LB, Schneider TR, Stukenberg PT, Musacchio A. Mechanism of Aurora B activation by INCENP and inhibition by Hesperadin. *Mol Cell.* 2005; 18:379–91.
17. Iimori M, Watanabe S, Kiyonari S, Matsuoka K, Sakasai R, Saeki H, Oki E, Kitao H, Maehara Y. Phosphorylation of EB2 by Aurora B and CDK1 ensures mitotic progression and genome stability. *Nat Commun.* 2016; 7:11117.
18. González-Loyola A, Fernández-Miranda G, Trakala M, Partida D, Samejima K, Ogawa H, Cañamero M, de Martino A, Martínez-Ramírez Á, de Cárcer G, Pérez de Castro I,

- Earnshaw WC, Malumbres M. Aurora B overexpression causes aneuploidy and p21Cip1 repression during tumor development. *Mol Cell Biol.* 2015; 35:3566–78.
19. Fernández-Miranda G, de Castro IP, Carmena M, Aguirre-Portolés C, Ruchaud S, Fant X, Montoya G, Earnshaw WC, Malumbres M. SUMOylation modulates the function of Aurora-B kinase. *J Cell Sci.* 2010; 123:2823–33.
  20. Liu D, Davydenko O, Lampson MA. Polo-like kinase-1 regulates kinetochore-microtubule dynamics and spindle checkpoint silencing. *J Cell Biol.* 2012; 198:491–9.
  21. Jang YJ, Lin CY, Ma S, Erikson RL. Functional studies on the role of the C-terminal domain of mammalian polo-like kinase. *Proc Natl Acad Sci USA.* 2002; 99:1984–9.
  22. Lee KS, Grenfell TZ, Yarm FR, Erikson RL. Mutation of the polo-box disrupts localization and mitotic functions of the mammalian polo kinase Plk. *Proc Natl Acad Sci U S A.* 1998; 95:9301–6.
  23. Hanisch A, Wehner A, Nigg EA, Silljé HHW. Different Plk1 functions show distinct dependencies on Polo-Box Domain-mediated targeting. *Mol Biol Cell.* 2006; 17:448–59.
  24. Kerppola TK. Design and implementation of bimolecular fluorescence complementation (BiFC) assays for the visualization of protein interactions in living cells. *Nat Protoc.* 2006; 1:1278–86.
  25. Suijkerbuijk SJ, Vleugel M, Teixeira A, Kops GJ. Integration of kinase and phosphatase activities by BUBR1 ensures formation of stable kinetochore-microtubule attachments. *Dev Cell.* 2012; 23:745–55.
  26. Maresca TJ, Salmon ED. Intrakinetochore stretch is associated with changes in kinetochore phosphorylation and spindle assembly checkpoint activity. *J Cell Biol.* 2009; 184:373–81.
  27. Krenn V, Musacchio A. The Aurora B kinase in chromosome bi-orientation and spindle checkpoint signaling. *Front Oncol.* 2015; 5:225.
  28. Herman JA, Toledo CM, Olson JM, DeLuca JG, Paddison PJ. Molecular pathways: regulation and targeting of kinetochore-microtubule attachment in cancer. *Clin Cancer Res.* 2015; 21:233–9.
  29. Tauchman EC, Boehm FJ, DeLuca JG. Stable kinetochore-microtubule attachment is sufficient to silence the spindle assembly checkpoint in human cells. *Nat Commun.* 2015; 6:10036.
  30. Kang YH, Park JE, Yu LR, Soung NK, Yun SM, Bang JK, Seong YS, Yu H, Garfield S, Veenstra TD, Lee KS. Self-regulated Plk1 recruitment to kinetochores by the Plk1-PBIP1 interaction is critical for proper chromosome segregation. *Molecular Cell.* 2006; 24:409–22.
  31. Petronczki M, Lenart P, Peters JM. Polo on the rise—from mitotic entry to cytokinesis with Plk1. *Dev Cell.* 2008; 14:646–59.
  32. Goto H, Kiyono T, Tomono Y, Kawajiri A, Urano T, Furukawa K, Nigg EA, Inagaki M. Complex formation of Plk1 and INCENP required for metaphase-anaphase transition. *Nat Cell Biol.* 2006; 8:180–7.
  33. Lee HS, Park YY, Cho MY, Chae S, Yoo YS, Kwon MH, Lee CW, Cho H. The chromatin remodeller RSF1 is essential for PLK1 deposition and function at mitotic kinetochores. *Nat Commun.* 2015; 6:7904.
